# Supplementary material for: Molecular basis of interactions between CaMKII and α-actinin-2 that underlie dendritic spine enlargement
Source: eLife. 2023 Jul 25;12:e85008. doi: 10.7554/eLife.85008 (PMC10484527; doi:10.7554/eLife.85008)
Supplement: Figure 1—figure supplement 2—source data 1. [file elife-85008-fig1-figsupp2-data1.xlsx]

## Sheet: Figure 2 Spine Type Source Data
	Condition	Pre NMDAR Activation			Post NMDAR Actviation
		Stubby	Thin	Mushroom	Stubby	Thin	Mushroom
	Spines with PLA puncta (%)	9.67742	30.7692	33.3333	44.4444	15.3846	85.1064
		30.6122	29.4118	81.8182	54.5455	68.75	100
		7.14286	5.88235	23.0769	41.6667	57.1429	89.1304
		33.3333	84.6154	100	57.8947	86.3636	97.7273
		13.8889	8.57143	50	41.6667	52.9412	75
		4.25532	8.82353	18.5185	50	57.8947	90
		8.57143	6.97674	35.7143	25	5.88235	75
		12.3077	38.0952	89.4737	72.7273	47.619	87.8788
		8.33333	9.67742	26.6667	50	44.4444	93.1034
		2.17391	3.84615	10.7143	85.7143	44.4444	90.9091
		5.55556	13.3333	34.2105	35.7143	30.4348	100
		14.2857	21.7949	54.6875	57.1429	25	93.3333
		2.27273	9.67742	12.5	7.69231	4.16667	61.2903
		6.12245	5.40541	25	10	12.5	82.2222
		12.7273	22.7273	64.2857	23.5294	15.3846	81.0811
		4.44444	16.6667	16.6667	16.6667	13.6364	86
		5.08475	14.2857	72.7273	15	16.6667	86.6667
		4.83871	7.14286	39.1304	9.09091	7.69231	33.3333
					12.5	9.375	72.7273
					19.0476	13.7931	59.5238
					10	14.2857	86.7925
	Mean	10.3127	18.7613	43.8069	35.2402	30.6573	82.2298
	SE	2.05902	4.52126	6.49741	4.97962	5.1925	3.42697
	Number of neurons	18	18	18	21	21	21
