# Supplementary material for: Molecular basis of interactions between CaMKII and α-actinin-2 that underlie dendritic spine enlargement
Source: eLife. 2023 Jul 25;12:e85008. doi: 10.7554/eLife.85008 (PMC10484527; doi:10.7554/eLife.85008)
Supplement: Figure 1—source data 1. [file elife-85008-fig1-data1.xlsx]

## Sheet: Figure 1 Source Data
	Actinin construct	WT		EF1-4		∆EF1-4		∆PDZ		EF1-4 ∆PDZ		GFP only
	NMDAR activation	Pre	Post	Pre	Post	Pre	Post	Pre	Post	Pre	Post	Pre	Post
	PLA puncta per 10 𝜇m dendrite	0.288462	1.27737	0.0571429	0.571429	0.0617284	0.210526	0.398551	1.13971	0.356083	0.451613	0.0666667	0.20339
		0.611702	1.75	0.0729927	0.917874	0.226244	0.3125	0.775862	1.0728	0.497738	0.601504	0.0353357	0.313901
		0.185185	1.25356	0.17341	0.819672	0.206897	0.227273	0.0332226	0.996678	0.206897	0.117994	0	0.383481
		0.960452	2.23744	0.728051	0.990566	0.0759494	0.177215	0.649351	1.18519	0.35443	0.231788	0.141844	0.0516796
		0.283019	1.2987	0.306748	0.952381	0.321285	0.133333	0.555556	1.06838	0.436364	0.623145	0.0609756	0.0895522
		0.183246	1.53509	0.577778	0.620438	0.209424		0.56701	0.8	0.277778	0.661479	0.0691244	0.0862069
		0.323625	1.13772	0.519481	0.761905			0.730994	0.677291	0.363636	0.955056	0.0727273	0.0320513
		0.392157	1.76166	0.384615	0.693642			0.833333	1.86047	0.144928	0.756014	0.0487805	0.0341297
		0.271493	1.82353	0.271739	1.55039			0.579151	0.772059	0.351759	1.12613	0.248227	0.0320513
		0.125786	1.57609	0.308057	1.3141			0.653266	0.645161	0.363636	0.496183	0.0611621	0.0358423
		0.4	1.70616	0.262172	1.17647			0.347072	0.914127	0.138504	0.816327	0.0408163	0.0498753
		0.50578	1.45161	0.485437	1.02564			0.230769	0.529801	0.381944	1.37143	0.0972763	0.168067
		0.186722	0.854701	0.564784	1.21212			0.322581	0.993377	0.287356	0.457143	0.25641	0.0543478
		0.195122	1.08571	0.583942	1.14428			0.116279	0.680628	0.131579	0.709459	0.0480769	0.0589971
		0.547945	1.16732	0.641026	1.10063			0.229885	0.286885	0.280374	0.877863	0.201342
		0.21978	0.899281	0.498221	1.05263			0.290698	0.599572		0.898204	0.116279
		0.294118	1.03896	0.336842	1.06529				0.876133		0.933333	0.0995025
		0.271493	0.403226	0.431373	1.42105				0.656371		0.992366	0.078125
			1.04938	0.406977	0.80292						0.636943
			0.900621	0.636364	0.992647						0.990991
			1	0.471698							0.472973
				0.199601
	Mean	0.347005	1.29563	0.405384	1.0093	0.183588	0.21217	0.457099	0.875256	0.304867	0.722759	0.0968151	0.113827
	SE	0.0480322	0.0915944	0.0395795	0.0573702	0.0401774	0.0297775	0.0609061	0.0804178	0.0283802	0.065313	0.0169455	0.0301428
	Number of neurons	18	21	22	20	6	5	16	18	15	21	18	14
