# Supplementary material for: Molecular basis of interactions between CaMKII and α-actinin-2 that underlie dendritic spine enlargement
Source: eLife. 2023 Jul 25;12:e85008. doi: 10.7554/eLife.85008 (PMC10484527; doi:10.7554/eLife.85008)
Supplement: Figure 2—source data 1. [file elife-85008-fig2-data1.xlsx]

## Sheet: Figure 2 Source Data
	Source Data for Panel 2A
	Time until fixing following NMDAR Activation (s)	0	10	30	120	600	3600
	PLA puncta per 10 𝜇m dendrite	0.28	0.6	1.07	1.15	1.43	1.3
		0.41	0.5	0.75	1.33	1.03	1.24
		0.39	0.71	0.78	0.94	1.57	1.2
		0.28	0.55	0.93	1.29	1.17	1.13
		0.63	0.57	0.86	0.92	1.22	1.24
		0.56	0.43	0.92	0.88	1.25	1.13
		0.39	0.92	1.08	1.64	1.28	1.16
		0.37	0.62	0.95	1.19	0.94	1.18
		0.41	0.72	1.04	1.12	0.91	1.19
		0.37	0.57	0.79	1.46	0.67	1.35
		0.41	0.65	0.63	1.57	1.26	1.11
		0.54	0.74	1.02	1.02	1.33	1.36
		0.43	0.62	0.89	1.24	1.31	1.21
		0.37	0.54	0.99	1.13	1.14	1.24
		0.53	0.57	0.82	1.04	1.12	1.03
		0.42	0.66	0.76	1.26	1.02	1.43
			0.57	0.98	1.02	1.32
					1.16	1.2
	Mean	0.424375	0.62	0.897647	1.18667	1.17611	1.21875
	SE	0.024048	0.0269258	0.0311015	0.0504684	0.0491971	0.0257532
	Number of neurons	16	17	17	18	18	16
	Source Data for Panel 2C
	Constructs	CaMKIIα WT + α-actinin-2		CaMKIIα T286A + α-actinin-2		CaMKIIα T305A+ α-actinin-2		CaMKIIα T306A + α-actinin-2		CaMKIIα WT only		α-actinin-2 only
	NMDAR activation	Pre	Post	Pre	Post	Pre	Post	Pre	Post	Pre	Post	Pre	Post
	PLA puncta per 10 𝜇m dendrite	0.399061	1.2931	0.354223	1.2766	0.27933	1.14883	0.46332	1.27358	0.078125	0.0961538	0.035461	0.0679117
		0.453401	1.11765	0.386598	1.20155	0.272727	0.997506	0.367816	1.14815	0.0735294	0.0759013	0.078329	0.0573614
		0.371353	1.46667	0.425532	1.08173	0.396476	1.11111	0.434783	1.34809	0.0543478	0.0473934	0.0589971	0.084507
		0.539326	1.35	0.37931	1.18694	0.403587	1.05556	0.440835	1.21212	0.0578035	0.0515464	0.0363636	0.0424628
		0.37594	1.2605	0.382166	1.25628	0.338983	1.19891	0.359116	1.35135	0.060241	0.058651	0.0253807	0.044843
		0.372208	1.14458	0.416667	1.16667	0.234987	1.06838	0.383747	1.15727	0.04329	0.0453515	0.0550964	0.0808625
		0.353698	1.34615	0.379747	1.14804	0.246305	0.971867	0.456026	1.24402	0.0649351	0.0527241	0.0787402	0.0634921
		0.357143	1.18584	0.467091	1.09091	0.314286	1.00365	0.497512	1.23675	0.0881057	0.0639659	0.111524	0.0728155
		0.425532	1.1399	0.405405	1.26761	0.33557	1.2012	0.38835	1.17137	0.0803213	0.0759494	0.109589	0.0496278
		0.352564	1.17479	0.458453	1.15385	0.247191	1.0989	0.446097	1.28668	0.0662252	0.0556586	0.0653595	0.0277008
		0.352113	1.27219	0.407056	1.26923	0.288889	1.07417	0.537313	1.21588	0.0497512	0.0947867	0.101523	0.0760456
		0.417495	1.3198	0.408654	1.10236	0.252525	1.18182	0.454545	1.10329	0.0382409	0.0449438	0.0684932	0
		0.414634	1.13636	0.426009	1.15502	0.28	1.07143	0.432432	1.28205	0.0373832	0.0303951	0.181818	0.0367647
		0.352645	1.30064	0.389016	1.10345	0.314961	1.24464	0.35868	1.24294	0.0294985	0.0498753	0.0576369	0.0609756
		0.357143	1.2069	0.399002	1.13208	0.31339	1.23482	0.518732	1.25382	0.0344828	0.0496278	0.0660793	0.0148368
		0.223577	1.24138	0.35503	1.21339	0.444444	1.13821	0.430839	1.2844	0.0689655	0.0288184	0.0913242	0.0285714
			1.12108	0.456989	1.08949	0.352423	1.2963	0.55	1.09756
			1.16822	0.30303	1.14943	0.335366	1.10119	0.379507	1.36483
			1.18687		1.16071	0.375427		0.452261
					1.22549
	Mean	0.382364	1.2333	0.399999	1.17154	0.317204	1.12214	0.439574	1.23745	0.0578279	0.0576089	0.0763572	0.0505487
	SE	0.0163758	0.0218616	0.00954937	0.0142197	0.0134866	0.0214019	0.0132783	0.0187128	0.00445813	0.00489592	0.00948526	0.0061123
	Number of neurons	16	19	18	20	19	18	19	18	16	16	16	16
