# Supplementary material for: Molecular basis of interactions between CaMKII and α-actinin-2 that underlie dendritic spine enlargement
Source: eLife. 2023 Jul 25;12:e85008. doi: 10.7554/eLife.85008 (PMC10484527; doi:10.7554/eLife.85008)
Supplement: Figure 3—figure supplement 1—source data 1. [file elife-85008-fig3-figsupp1-data1.xlsx]

## Sheet: Figure 2 Supp 1 PLA Source Data
	Actinin construct	EF1-4 WT		EF1-4 L854R		GFP only
	NMDAR activation	Pre	Post	Pre	Post	Pre	Post
	PLA puncta per 10 𝜇m dendrite	0.71	1.31	0.07	0.38	0	0.07
		0.49	0.81	0.07	0.36	0	0
		0.66	2.11	0.09	0.22	0	0
		0.19	1.23	0.06	0.14	0	0.08
		0.5	0.99	0.08	0.37	0	0
		0.3	0.9	0.09	0	0	0
		0.16	0.51	0.26	0	0	0
		0.61	1.63	0.18	0.34	0	0
		0.64	0.4	0.11	0.11	0	0.035461
		0.7	0.48	0.15	0.4	0.0035461	0
		0.23	0.96	0.06	0.39	0	0.0363636
		0.73	1.2	0.12	0	0	0.0357143
		0.51	2.2	0.1	0	0	0.0444444
		0.68	2.52	0.1	0.11	0	0
		0.88	1.53	0.2	0.32	0	0
		0.96	1.5	0.1	0.21	0	0
		0.72	1.02		0.29	0
		1.19
		0.23
		0.86
		0.18
	Mean	0.58	1.25	0.12	0.21	0	0.02
	SE	0.0619863	0.14773	0.01403	0.0376505	0.00020859	0.00691452
	Number of neurons	21	17	16	17	17	16
