# Supplementary material for: Molecular basis of interactions between CaMKII and α-actinin-2 that underlie dendritic spine enlargement
Source: eLife. 2023 Jul 25;12:e85008. doi: 10.7554/eLife.85008 (PMC10484527; doi:10.7554/eLife.85008)
Supplement: Figure 3—figure supplement 2—source data 1. [file elife-85008-fig3-figsupp2-data1.xlsx]

## Sheet: Fig 3-supplement 2 source data
	Source Data for Panel 2A
	Construct	EF1-4 WT disruptor			EF1-4 L854R disruptor			GFP only
	NMDAR activation	Pre	1 hour post	4 hours post	Pre	1 hour post	4 hours post	Pre	1 hour post	4 hours post
	Total spines per 10 𝜇m dendrite	2.18302	1.7	3.77	2.65	2.28	2.53	2.87	2.63	3
		1.36228	1.48	2.64	2.63	2.55	1.82	2.96	3.67	2.75
		2.74386	3.08	3.02	3.78	2.53	3.8	2.1	3.43	4.03
		1.90823	2.69	3.93	2.53	5.72	2.88	2.68	3.7	3.77
		2.01915	0.98	1.62	3.41	2.63	3.45	3.66	2.59	2.37
		1.78946	2.77	1.43	3.33	3.41	4.1	2.55	7.06	2.32
		2.5546	2.19	3.13	4.81	3.45	5.13	2.3	3.44	2.13
		2.19264	1.18	2.09	3.14	3.06	3.09	3.22	1.81	2.74
		2.74377	1.61	5.03	2.99	2	1.7	2.8	3.12	3.87
		2.04082	1.59	2.06	2.47	2.09	3.94	2.81	2.44	4.52
		1.94204	1.24	1.91	2.85	2.16	3.33	3.67	1.56	2.16
		1.49158	1.9	2.07		3.11	4.45	3.48	3.11	3.49
		1.77721	2.37	2.68		2.54	3.25	5.71	1.37
		1.8506	1.57	1.05		2.62	1.72	1.76	0.97
		2.54878		1.46		2.77	2.57		1.16
						5.31	2.26
	Mean	2.07654	1.88214	2.526	3.14455	3.01437	3.12625	3.04071	2.804	3.09583
	SE	0.108962	0.171929	0.282556	0.207476	0.26723	0.251567	0.253777	0.387439	0.235213
	Number of neurons	15	14	15	11	16	16	14	15	12
	Source Data for Panel 2B
	Construct	EF1-4 WT disruptor			EF1-4 L854R disruptor			GFP only
	NMDAR activation	Pre	1 hour post	4 hours post	Pre	1 hour post	4 hours post	Pre	1 hour post	4 hours post
	Average spine width (𝜇m)	0.18	0.43	0.31	0.29	0.46	0.44	0.34	0.64	0.75
		0.3	0.36	0.45	0.3	0.33	0.59	0.33	0.48	0.61
		0.29	0.32	0.28	0.29	0.42	0.5	0.31	0.34	0.5
		0.36	0.35	0.21	0.26	0.46	0.64	0.39	0.51	0.55
		0.3	0.27	0.44	0.3	0.43	0.36	0.38	0.28	0.55
		0.31	0.28	0.31	0.3	0.36	0.72	0.42	0.27	0.66
		0.26	0.26	0.37	0.26	0.35	0.41	0.4	0.32	0.55
		0.23	0.32	0.25	0.33	0.4	0.79	0.41	0.33	0.49
		0.29	0.3	0.35	0.28	0.46	0.44	0.45	0.27	0.54
		0.34	0.26	0.24	0.31	0.36	0.51	0.41	0.41	0.5
		0.34	0.27	0.36	0.38	0.4	0.37	0.34	0.4	0.56
		0.31	0.3	0.36		0.41	0.23	0.29	0.31	0.51
		0.36	0.28	0.25		0.4	0.44	0.28	0.75
		0.26	0.34	0.31		0.43	0.47	0.25	0.64
		0.22		0.33		0.34	0.47		0.73
						0.33	0.53
	Mean	0.29	0.31	0.321333	0.3	0.39625	0.494375	0.357143	0.445333	0.564167
	SE	0.0134872	0.0127959	0.0180176	0.0100905	0.0115425	0.0348086	0.0160845	0.0439466	0.0219662
	Number of neurons	15	14	15	11	16	16	14	15	12
