# Supplementary material for: Molecular basis of interactions between CaMKII and α-actinin-2 that underlie dendritic spine enlargement
Source: eLife. 2023 Jul 25;12:e85008. doi: 10.7554/eLife.85008 (PMC10484527; doi:10.7554/eLife.85008)
Supplement: Figure 3—source data 1. [file elife-85008-fig3-data1.xlsx]

## Sheet: Figure 2 Spine Type Source Data
	Condition	GFP only pre NMDAR activation				GFP only 1 hour post NMDAR activation				GFP only 4 hours post NMDAR activation				EF1-4 WT pre NMDAR acativation				EF1-4 WT 1 hour post NMDAR activation				EF1-4 WT 4 hours post NMDAR activation				EF1-4 L854R pre NMDAR activation				EF1-4 L854R 1 hour post NMDAR activation				EF1-4 L854R 4 hours post NMDAR activation
	Type	Stubby	Thin	Mushroom	Total	Stubby	Thin	Mushroom	Total	Stubby	Thin	Mushroom	Total	Stubby	Thin	Mushroom	Total	Stubby	Thin	Mushroom	Total	Stubby	Thin	Mushroom	Total	Stubby	Thin	Mushroom	Total	Stubby	Thin	Mushroom	Total	Stubby	Thin	Mushroom	Total
	spines per 10 𝜇m	1.67127	0.653975	0.544979	2.87022	0.65828	0.292569	1.68227	2.63312	0.142878	0.714388	2.14316	3.00043	0.854226	1.28134	0	2.18302	0.661632	0.472594	0.567113	1.70134	2.10175	1.30454	0.362371	3.76866	1.39548	0.976835	0.279096	2.65141	0.651763	0.0651763	1.56423	2.28117	0.187248	1.12349	1.21711	2.52785
		1.69384	0.0705766	1.1998	2.96422	0.47824	1.11589	2.07237	3.66651	0.916978	0.493757	1.3402	2.75093	0.743062	0.371531	0.123844	1.36228	1.18018	0.177027	0.118018	1.47522	2.24	0.24	0.16	2.64	1.8134	0.36268	0.45335	2.62943	0.182216	0.546647	1.82216	2.55102	0.780742	0.520494	0.520494	1.82173
		1.46702	0.191351	0.382702	2.10486	0.648268	1.48176	1.29654	3.42656	0.56301	0.93835	2.53354	4.0349	1.98168	0.609747	0.152437	2.74386	1.68261	0.913418	0.480746	3.07678	1.69392	1.03108	0.294594	3.01959	2.59618	0.944064	0.236016	3.77626	0.223664	0.521882	1.78931	2.53485	0.862887	1.5532	1.38062	3.7967
		0.287356	0.287356	2.10728	2.68199	1.37682	0.688409	1.63497	3.7002	0.279215	1.67529	1.8149	3.76941	0.520427	0.867378	0.520427	1.90823	1.23303	0.896749	0.560468	2.69025	1.91205	1.91205	0.106225	3.93032	1.5514	0.734874	0.244958	2.53123	2.35397	1.12094	2.24187	5.71677	0.0992063	1.19048	1.5873	2.87698
		1.83098	0.858271	0.972707	3.66196	0.258512	1.73573	0.590886	2.58512	1.11324	0.278311	0.974089	2.36565	1.43294	0.130268	0.455937	2.01915	0.815411	0.163082	0	0.978493	0.998365	0.249591	0.374387	1.62234	1.6599	1.29104	0.461084	3.41203	0.438097	1.22667	0.963813	2.62858	0.517732	1.46691	1.46691	3.45155
		0.536409	0.402307	1.47512	2.54794	0.921234	4.22232	1.91924	7.0628	0.868673	0.289558	1.15823	2.31646	1.02255	0.306764	0.460146	1.78946	1.71698	0.660376	0.396226	2.77358	1.26876	0.0792976	0.0792976	1.42736	1.89688	0.804736	0.632293	3.33391	0.0897433	1.88461	1.43589	3.41025	0.492126	0.328084	3.28084	4.10105
		1.76735	0.267781	0.267781	2.30291	0.618429	1.99272	0.824572	3.43572	0.685788	0.0685788	1.37158	2.12594	1.14957	0.766381	0.638651	2.5546	1.09317	0.819875	0.182194	2.18633	1.45719	1.45719	0.218579	3.13297	2.38163	1.57188	0.857388	4.8109	0.574548	2.01092	0.861821	3.44729	0.831255	1.10834	3.18648	5.12607
		1.60976	0.847242	0.762518	3.21952	0.150489	0.902935	0.752445	1.80587	0.598833	0.598833	1.53986	2.73752	0.923217	0.750114	0.51931	2.19264	0.785059	0.392529	0	1.17759	0.974523	0.696088	0.417653	2.08826	1.28057	1.15252	0.704316	3.13741	2.32043	0.632845	0.105474	3.05875	0.719632	0	2.37478	3.09442
		1.00366	0.358449	1.43379	2.7959	0.68647	1.62257	0.811283	3.12032	0.234469	1.64128	1.99299	3.86874	1.82918	0.649063	0.265526	2.74377	0.683661	0.781326	0.0976658	1.61149	2.24537	2.51482	0.269445	5.02964	0.995685	1.10632	0.885054	2.98706	0.0625889	0.751066	1.18919	2.00284	1.10816	0.147754	0.443262	1.69917
		2.2215	0.326691	0.261352	2.80954	0.654723	0.833284	0.952324	2.44033	1.17991	1.57322	1.76987	4.523	1.05559	0.70373	0.281492	2.04082	1.01704	0.508518	0.0635647	1.58912	0.654756	1.12244	0.187073	2.05781	1.37851	0.870638	0.217659	2.46681	0.523373	0.654216	0.915902	2.09349	0.358474	1.29051	2.29424	3.94322
		1.73415	0.725924	1.20987	3.66995	0.361952	0.506732	0.687708	1.55639	0.607574	0.472558	1.08013	2.16026	2.88529	0.422238	0.281492	1.94204	0.497172	0.621465	0.124293	1.24293	0.596979	1.01486	0.29849	1.91033	1.05708	1.2685	0.528541	2.85412	1.3142	0.563227	0.281614	2.15904	0.848359	1.82723	0.652584	3.32818
		1.68498	0.612722	1.26374	3.48485	0.77694	1.3208	1.01002	3.10776	0.849217	1.13229	1.50972	3.49122	1.08478	0.237296	0.169497	1.49158	0.837054	0.669643	0.279018	1.89732	0.869754	1.03283	0.163079	2.06567					0.8549	0.777182	1.47665	3.10873	1.63922	2.26368	0.546405	4.4493
		2.99757	1.04677	1.66532	5.70966	0.216092	0.144061	1.00843	1.36858					0.781972	0.568707	0.42653	1.77721	0.972113	0.911355	0.364542	2.36952	0.730905	1.76635	0.182726	2.67999					0.940822	0.376329	1.12899	2.54022	0.97928	1.23699	1.03082	3.24709
		0.464339	0.557207	0.742942	1.76449	0.214815	0.0358025	0.71605	0.966668					0.678552	0.493492	0.370119	1.8506	0.682734	0.682734	0.0682734	1.57029	0.263089	0.736648	0.0526177	1.05235					0.068899	1.37798	1.17128	2.61816	0.221693	0.277116	1.21931	1.71812
						0.680248	0.107408	0.375926	1.16358					1.66989	0.527333	0.351556	2.54878					0.3367	0.953984	0.16835	1.45903					0.291142	1.31014	1.16457	2.76585	0.385902	0.707486	1.47929	2.57268
																														0.965997	2.02859	2.22179	5.31298	0.308769	0.617538	1.338	2.26431
	Mean	1.49787	0.514759	1.02071	3.042	0.580101	1.13353	1.089	2.80264	0.669983	0.823035	1.60236	3.09537	1.24086	0.579025	0.334464	2.07654	0.989845	0.619335	0.235866	1.88145	1.22294	1.07412	0.222326	2.52562	1.63697	1.00764	0.499978	3.1446	0.741022	0.990526	1.27091	3.01437	0.646292	0.978706	1.50115	3.12615
	SE	0.193738	0.0768187	0.14868	0.25358	0.0828338	0.273564	0.132699	0.387622	0.09653	0.163101	0.134406	0.235795	0.161521	0.0734259	0.045188	0.108962	0.0980572	0.0668142	0.0542962	0.171953	0.176016	0.170471	0.0284523	0.282579	0.153172	0.097829	0.0740389	0.207505	0.180525	0.150276	0.149274	0.267075	0.10105	0.160259	0.219315	0.251412
	number of neurons	14	14	14	14	15	15	15	15	12	12	12	12	15	15	15	15	14	14	14	14	15	15	15	15	11	11	11	11	16	16	16	16	16	16	16	16
