# Supplementary material for: Molecular basis of interactions between CaMKII and α-actinin-2 that underlie dendritic spine enlargement
Source: eLife. 2023 Jul 25;12:e85008. doi: 10.7554/eLife.85008 (PMC10484527; doi:10.7554/eLife.85008)
Supplement: Figure 4—source data 1. [file elife-85008-fig4-data1.xlsx]

## Sheet: Figure 3 ITC Source Data
	Cell	Syringe	Replicate	N	Kd (𝜇M)	∆H	-T∆S
	EF3-4	CaMKII𝛼 (294-315)	1	0.961	30.1	-6.74	0.568
			2	0.916	32.7	-6.88	0.759
			3	1.07	33.6	-6.61	0.508
			Mean	0.982333	32.1333	-6.74333	0.611667
			SE	0.0373284	0.856781	0.0636542	0.0617888
	Trx-CaMKII𝛼 (1-315)	EF3-4	1	ND	ND	ND	ND
			2	ND	ND	ND	ND
			3	ND	ND	ND	ND
	EF1-4	CaMKII𝛼 (294-315)	1	1	11	-3.03	-3.74
			2	1	11.6	-3.05	-3.69
			3	0.945	11.5	-3.04	-3.71
			Mean	0.981667	11.3667	-3.04	-3.71333
			SE	0.0149691	0.151535	0.00471405	0.0118634
	Trx-CaMKII𝛼 (1-315)	EF1-4	1	ND	ND	ND	ND
			2	ND	ND	ND	ND
			3	ND	ND	ND	ND
	CaM	CaMKII𝛼 (294-315)	1	0.914	0.00977	4.36	-14.7
			2	1.01	0.0128	3.89	-14.1
			3	1.05	0.0111	4.56	-14.9
			Mean	0.991333	0.0112233	4.27	-14.5667
			SE	0.0329489	0.000715951	0.162138	0.196261
	Trx-CaMKII𝛼 (1-315)	CaM	1	1.03	2.53	11.2	-18.4
			2	1.09	3.04	11.4	-18.6
			Mean	1.06	2.785	11.3	-18.5
			SE	0.0212132	0.180312	0.0707107	0.0707107
	EF3-4	CaMKII𝛼 (299-315)	1	0.697	19.6	-12.1	5.63
			2	0.636	14.1	-9.93	3.31
			3	0.643	19.6	-11.7	5.29
			Mean	0.658667	17.7667	-11.2433	4.74333
			SE	0.0157363	1.49691	0.544392	0.590618
	CaM	CaMKII𝛼 (299-315)	1	1.02	0.0443	4.51	-14.1
			2	0.996	0.0492	4.43	-13.9
			3	0.987	0.0475	4.59	-14.1
			Mean	1.001	0.047	4.51	-14.0333
			SE	0.00804156	0.00117284	0.0377124	0.0544331
