# Supplementary material for: Molecular basis of interactions between CaMKII and α-actinin-2 that underlie dendritic spine enlargement
Source: eLife. 2023 Jul 25;12:e85008. doi: 10.7554/eLife.85008 (PMC10484527; doi:10.7554/eLife.85008)
Supplement: Figure 6—source data 1. [file elife-85008-fig6-data1.xlsx]

## Sheet: Figure 6 Source Data
	Panel 6D source data										Panel 6G source data
			CaMKII recovery (%)								Construct	GluN2B WT		GluN2BΔCaMKII		GFP only
	EGTA (mM)	GluN2Bc	Rep A	Rep B	Rep C	Mean	SE				NMDAR activation	Pre	Post	Pre	Post	Pre	Post
	10	No	2.54366	3.80744	1.20817	2.51976	0.750439				PLA puncta per 10 𝜇m dendrite	0.548387	1.48325	0.282486	0.469043	0.0857143	0.0732601
	10	Yes	33.4552	32.6343	31.6835	32.591	0.511919					0.520833	1.46018	0.322581	0.433071	0.0789474	0.033557
	2.5	No	1.21775	2.18796	1.67625	1.69398	0.280217					0.284698	1.45	0.316742	0.450161	0.149254	0.0575816
	2.5	Yes	17.6992	53.0699	22.9378	31.2356	11.0214					1.07884	1.28	0.319767	0.428305	0.105263	0.0606061
	1.8	No	0.04975	-0.244044	0.0506319	-0.0478874	0.0980787					0.731707	1.19266	0.273438	0.392157	0.0765306	0.0442478
	1.8	Yes	56.4673	15.5395	49.3568	40.4545	12.6255					0.963855	1.10155	0.341151	0.381526	0.0816327	0.0541516
												0.652174	1.18812	0.29703	0.341686	0.176471	0.0872093
												0.538302	0.973451	0.260417	0.32	0.0970874	0.0636943
												0.662651	1.12403	0.126582	0.340909	0.143885	0.106383
												0.787589	1.12426	0.212314	0.290323	0.0328947	0.0589971
												0.538462	1.02564	0.189189	0.383275	0.0868056	0.097561
												0.561497	1.11597	0.601719	0.293542	0.0826446	0.096463
												0.6	1.20773	0.189959	0.445545	0.136986	0.0728597
												0.525164	1.28205	0.244755	0.37594	0.114943	0.0291545
												0.721003	1.23116	0.248963	0.44316	0.152091	0.0492611
												0.666667	1.31868	0.304878	0.56338	0.117647	0.106383
												0.675105	1.39918	0.233645	0.438356
												0.800712		0.344828	0.495283
														0.344828
											Mean	0.658758	1.23282	0.28712	0.404759	0.107425	0.0682106
											SE	0.0422702	0.0368929	0.0222688	0.0169454	0.00923846	0.00616281
											Number of neurons	18	17	19	18	16	16
											Panel 6H source data
											Constructs	GluN2B WT + α-actinin-2		GluN2BΔCaMKII + α-actinin-2		GluN2B WT only		α-actinin-2 only
											NMDAR activation	Pre	Post	Pre	Post	Pre	Post	Pre	Post
											PLA puncta per 10 𝜇m dendrite	0.42	0.49	0.36	0.51	0.05	0.03	0.05	0.07
												0.5	0.55	0.37	0.45	0.06	0.04	0.03	0.02
												0.4	0.58	0.41	0.42	0.08	0.04	0.06	0.02
												0.53	0.59	0.33	0.41	0.06	0.02	0.02	0.03
												0.51	0.56	0.42	0.4	0.07	0.06	0.04	0.02
												0.48	0.49	0.35	0.49	0.03	0	0.03	0.04
												0.53	0.61	0.41	0.47	0.08	0.03	0.04	0.03
												0.57	0.52	0.47	0.43	0.04	0.04	0.05	0.04
												0.26	0.7	0.42	0.41	0.03	0.05	0.04	0.06
												0.61	0.75	0.38	0.4	0	0.04	0.05	0.04
												0.43	0.72	0.39	0.46	0.03	0.04	0.04	0.04
												0.51	0.52	0.42	0.39	0	0.02	0.02	0.06
												0.52	0.71	0.35	0.42	0.04	0.04	0.05	0.03
												0.45	0.72	0.45	0.35	0.04	0.02	0.05	0.03
												0.49	0.64	0.3	0.35	0.02	0.04	0.03	0.02
												0.32	0.51	0.39	0.41	0.03	0.02	0.05	0.04
												0.47	0.77	0.26	0.34
												0.43	0.53	0.32
												0.44	0.57
											Mean	0.466842	0.606842	0.377778	0.418235	0.04125	0.033125	0.040625	0.036875
											SE	0.0189035	0.0215354	0.0126428	0.0115439	0.00611521	0.00361925	0.00295363	0.00384261
											Number of neurons	19	19	18	17	16	16	16	16
