# Supplementary material for: Molecular basis of interactions between CaMKII and α-actinin-2 that underlie dendritic spine enlargement
Source: eLife journal article supplement (doi:10.7554/elife.85008), 2023-07-25
Supplement: supp [file elife-85008-supp-v1.zip]

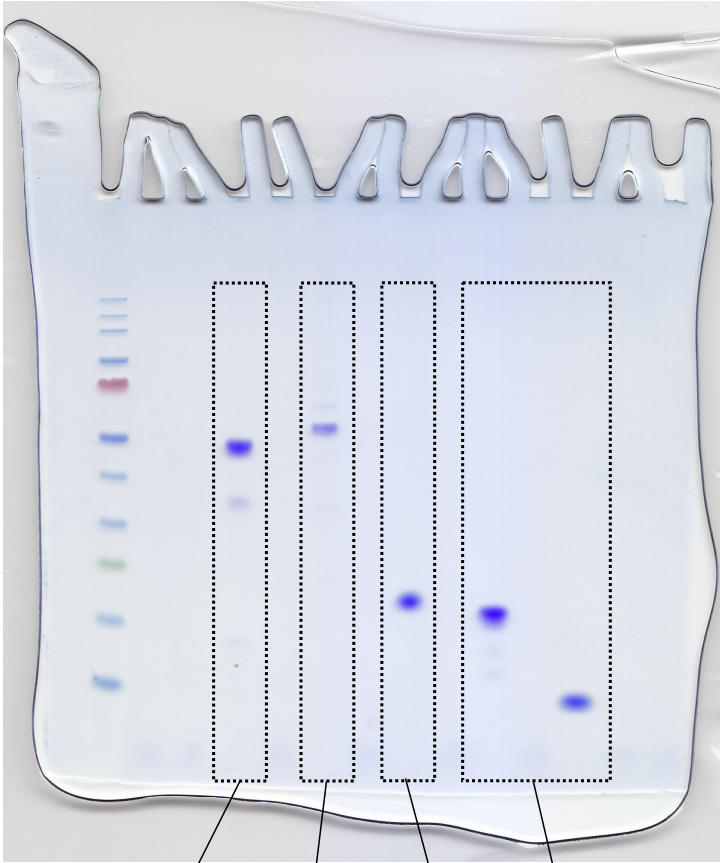

Panel: **B**    **D**    **C**    **A**

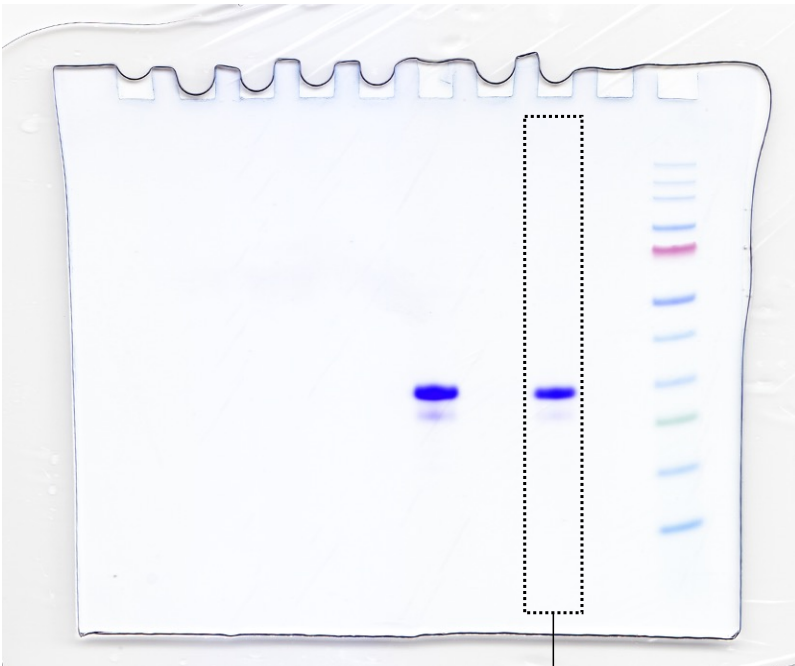

Panel: **E**
