# Supplementary figures and images for: Molecular basis of interactions between CaMKII and α-actinin-2 that underlie dendritic spine enlargement
Source: eLife journal article supplement (doi:10.7554/elife.85008), 2023-07-25

**D** *Upper sub-panel*

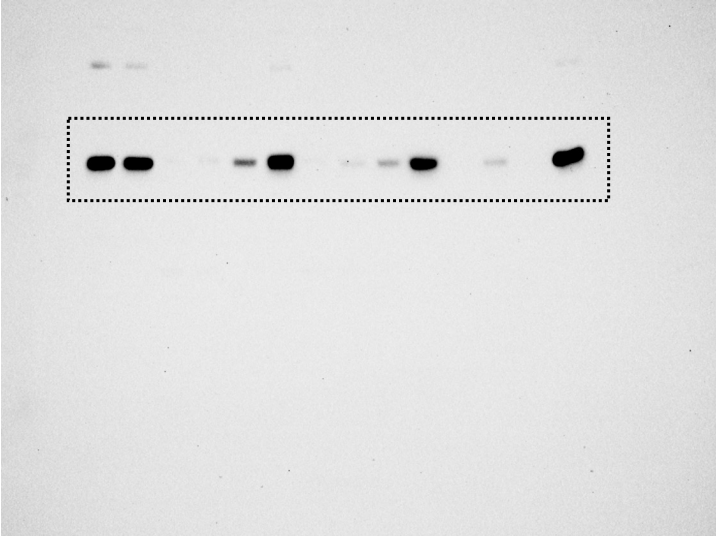

IB: CaMKII $\alpha$

**D** *Lower sub-panel*

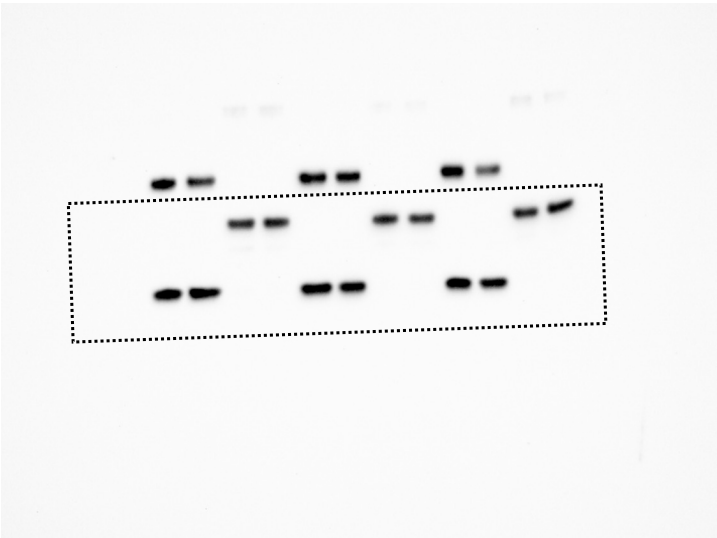

IB: GST

Supplement: supp [file elife-85008-supp-v1.zip]
